# Supplementary material
Source: MDPI journal article supplement (https://www.mdpi.com/search?q=cancers-12-01753)
Supplement: s001 [file cancers-12-01753-s001.pdf]

Article

# Ceramide Synthase 5 Deficiency Aggravates Dextran Sodium Sulfate-Induced Colitis and Colon Carcinogenesis and Impairs T-Cell Activation

Khadija El-Hindi <sup>1,†</sup>, Sebastian Brachtendorf <sup>1,†</sup>, Jennifer Christina Hartel <sup>1,5</sup>, Stephanie Oertel <sup>1</sup>, Kerstin Birod <sup>1</sup>, Sandra Trautmann <sup>1</sup>, Dominique Thomas <sup>1</sup>, Thomas Ulshöfer <sup>2</sup>, Andreas Weigert <sup>3</sup>, Olaf Utermöhlen <sup>4</sup>, Martin Krönke <sup>4</sup> and Sabine Grösch <sup>1,\*</sup>

<sup>1</sup> Institute of Clinical Pharmacology, Faculty of Medicine, Goethe-University Frankfurt; Frankfurt 60590, Germany; El-Hindi@med.uni-frankfurt.de (K.E.-H.); Sebastian.Brachtendorf@web.de (S.B.); jhartel@med.uni-frankfurt.de (J.C.H.); stephi1106@hotmail.com (S.O.); k.birod@med.uni-frankfurt.de (K.B.); trautmann@med.uni-frankfurt.de (S.T.); thomas@med.uni-frankfurt.de (D.T.)

<sup>2</sup> Fraunhofer Institute for Molecular Biology and Applied Ecology IME, Project Group Translational Medicine and Pharmacology (TMP), Frankfurt 60596, Germany; Thomas.Ulshoefer@ime.fraunhofer.de

<sup>3</sup> Institute of Biochemistry I-Pathobiochemistry, Faculty of Medicine, Goethe-University Frankfurt; Frankfurt, Germany; weigert@biochem.uni-frankfurt.de

<sup>4</sup> Center for Molecular Medicine Cologne, Institute for Medical Microbiology, Immunology and Hygiene, University of Cologne, Cologne 50935, Germany; olaf.uterhoehlen@uk-koeln.de (O.U.); m.kroenke@uni-koeln.de (M.K.)

<sup>5</sup> Department of Life Sciences, Goethe-University Frankfurt, Frankfurt, Germany

\* Correspondence: groesch@em.uni-frankfurt.de; Tel.: +49/69-6301-7820; Fax: +49/69-6301-7660

† Authors contributed equally.

## Supplementary

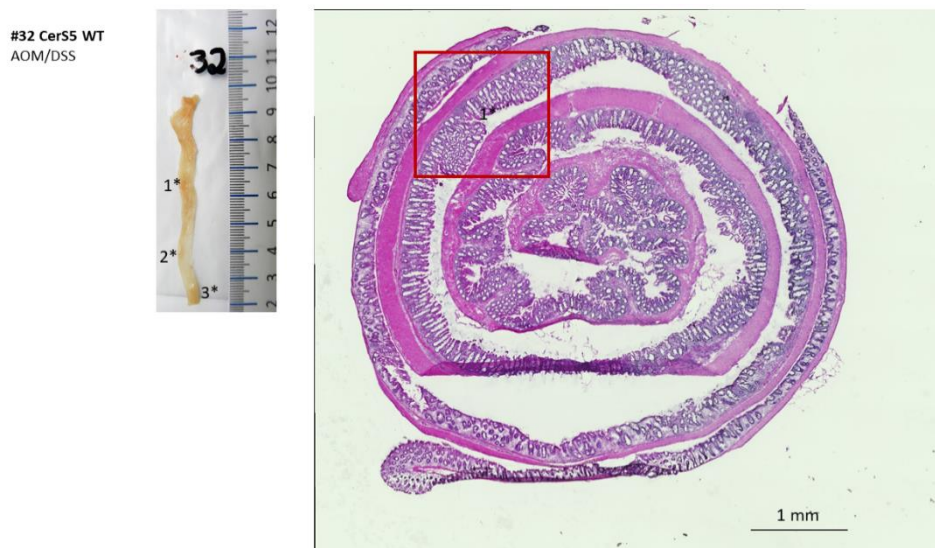

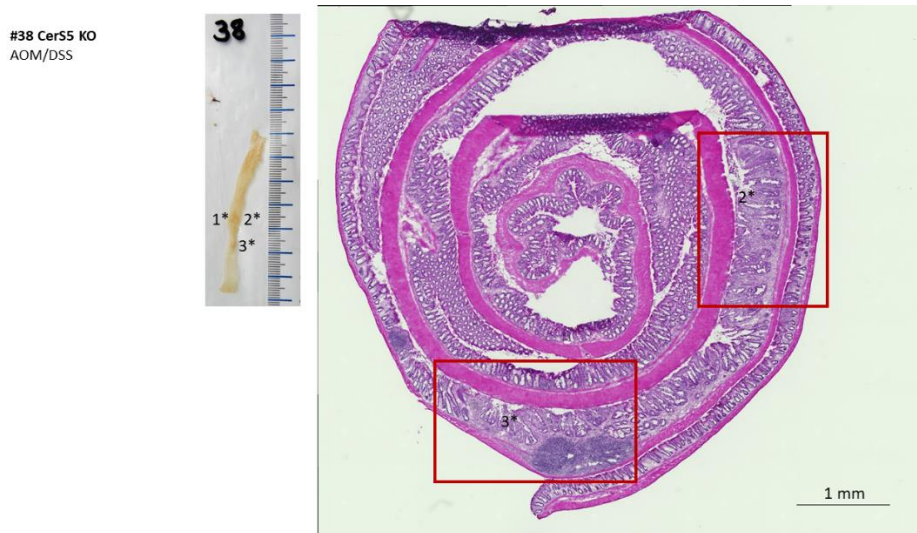

**Figure S1.** IHC of colon roles. Exemplary pictures of whole colons from CerS5-wt and CerS5-ko mice and immunohistological pictures of colon roles (10  $\mu$ m tissue sections stained with eosin and hematoxylin) with tumor regions (red boxes). Images were taken with the Keyence BZ-9000 microscope with 10-fold magnification and recomposed by the software.

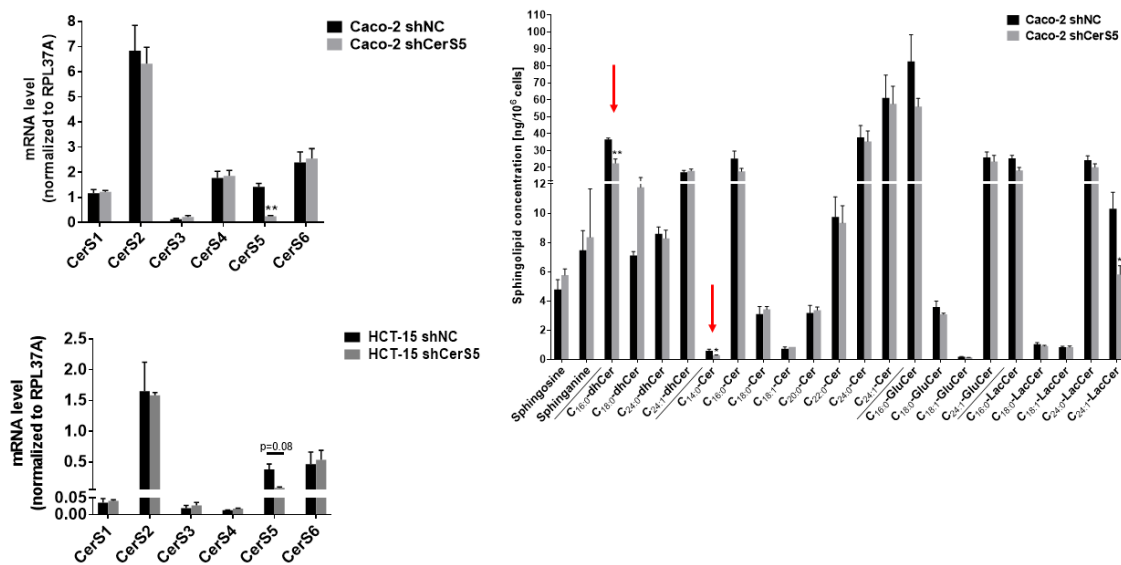

**Figure S2.** Downregulation of CerS5 in Colon cancer cell lines. Downregulation of CerS5 expression by lentiviral transduction of Caco-2 and HCT-15 cells with CerS5-targeting shRNA. In both human colon cancer cell lines, CerS5 mRNA expression could be downregulated, whereas the expression levels of other CerS were not affected. Downregulation of CerS5 was accompanied by significant decreases in the long-chain ceramides C14:0-Cer and C16:0-Cer in Caco-2 cells. Data are mean +/- SEM of two (HCT-15) or three (Caco-2) independent experiments.

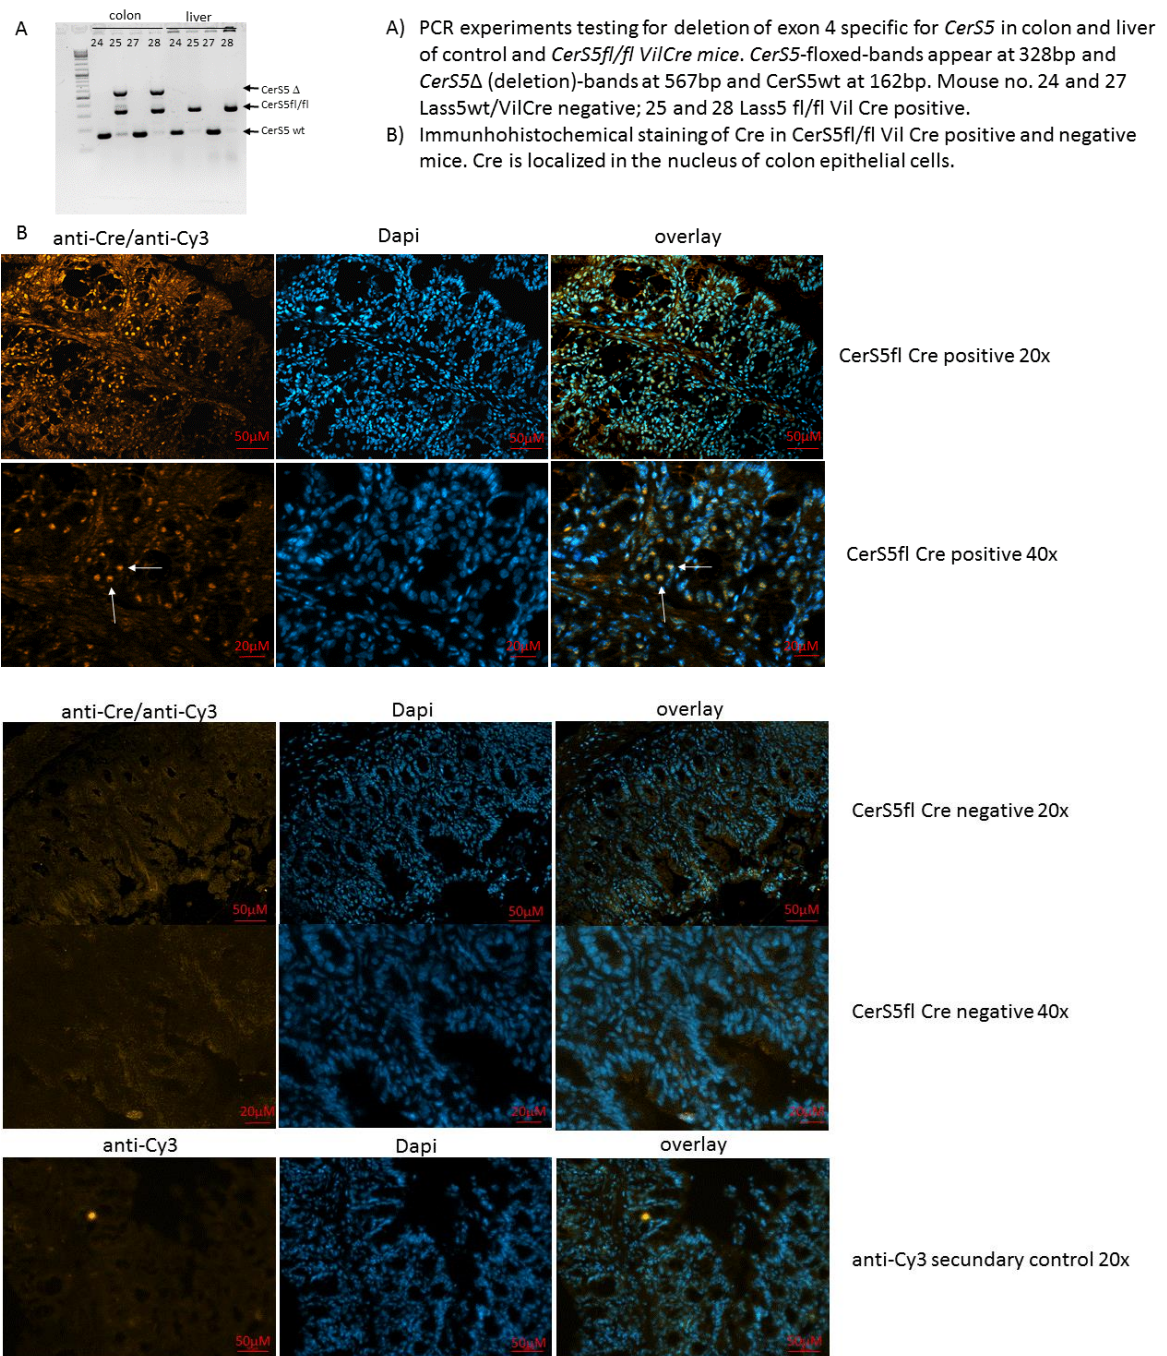

Figure S3. (A) PCR experiments testing for detection of exon 4 specific for *CerS5* in colon and liver of control and *CerS5fl/fl VilCre* mice. *CerS5*-floxed-bands appear at 328 bp and *CerS5 $\Delta$*  (deletion)-bands at 567 bp and *CerS5wt* at 162 bp. Mouse no.24 and 27 *Lass5wt/Vil Cre* negative; 25 and 28 *Lass5wt/Vil Cre* positive. (B) Immunohistochemical staining of Cre in *CerS5fl/fl Vil Cre* positive and negative mice. Cre is localized in the nucleus of colon epithelial cells.

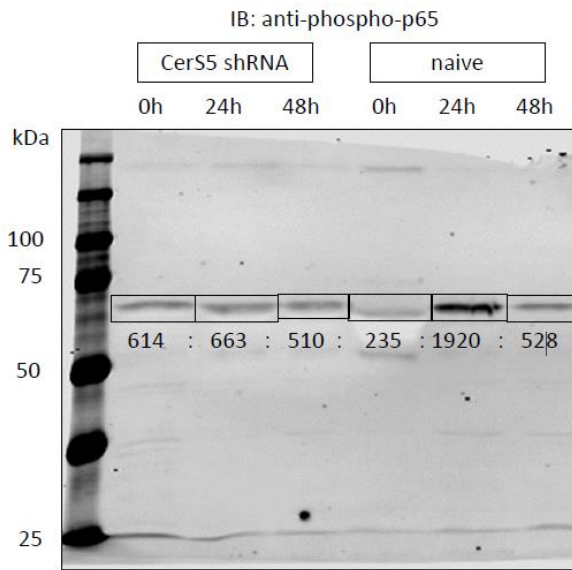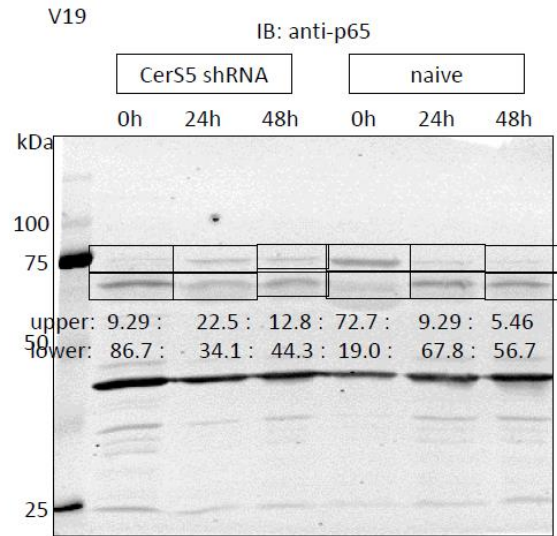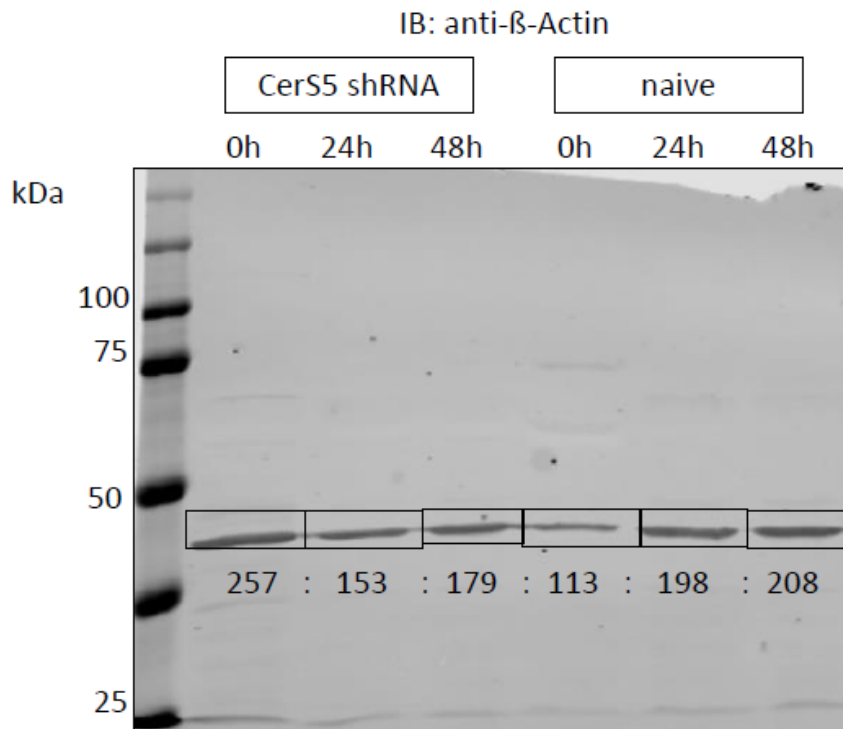



V20 (Figure 6)

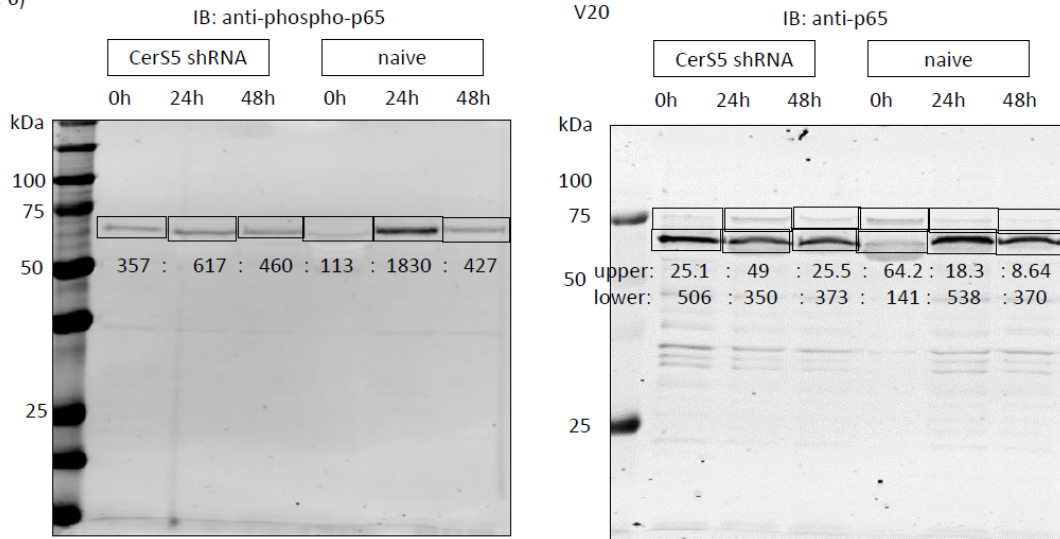

V20 (Figure 6)

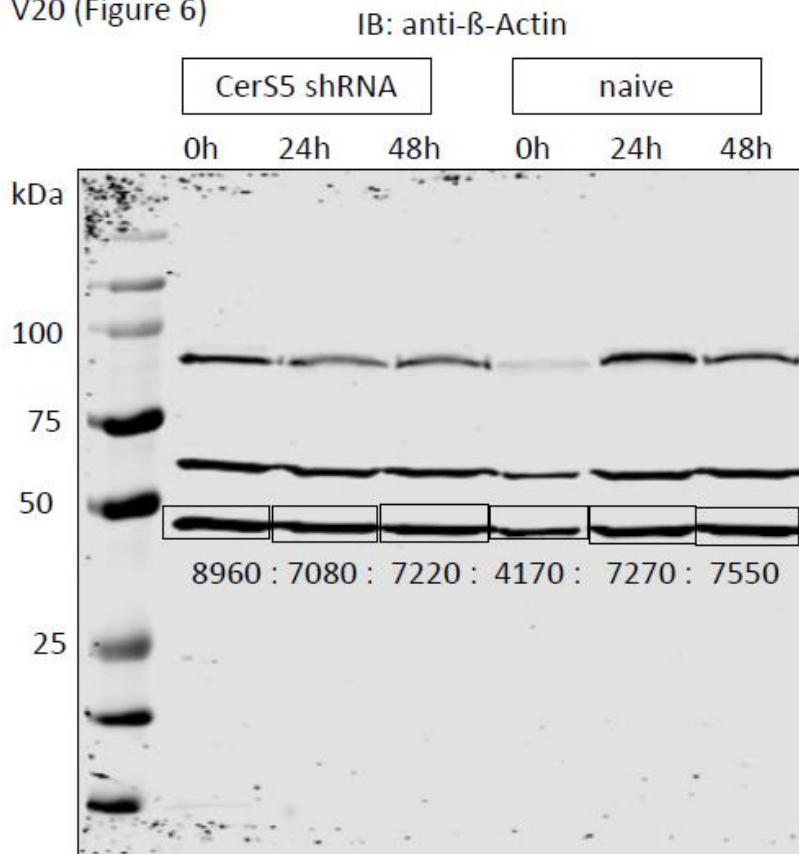

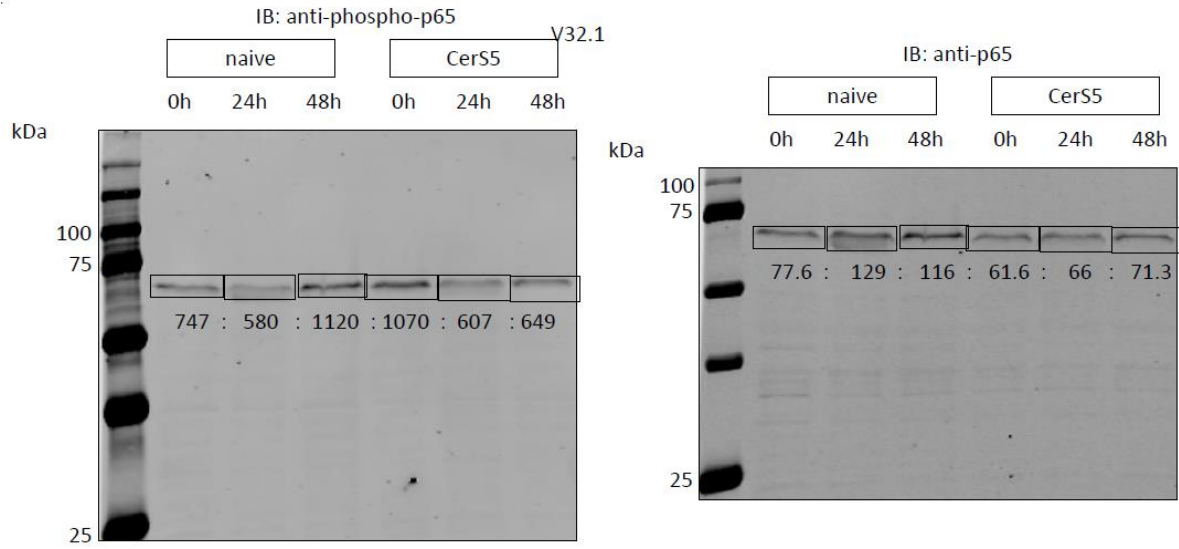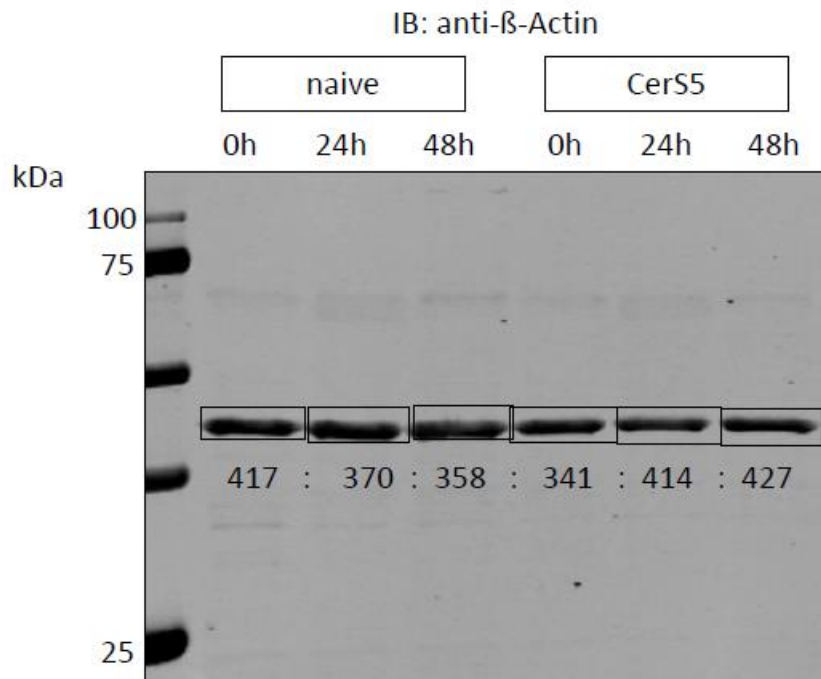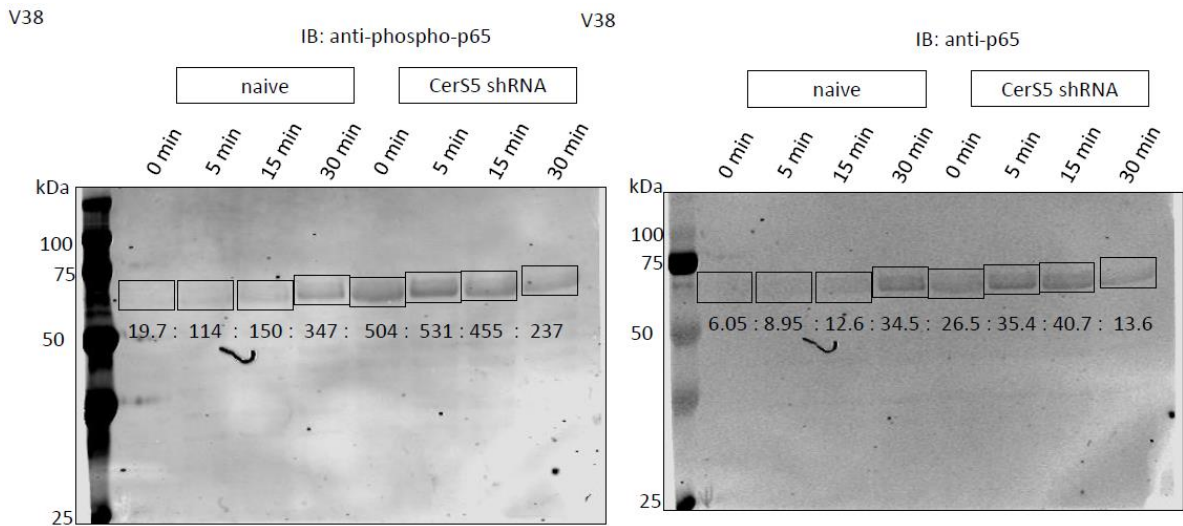

V38

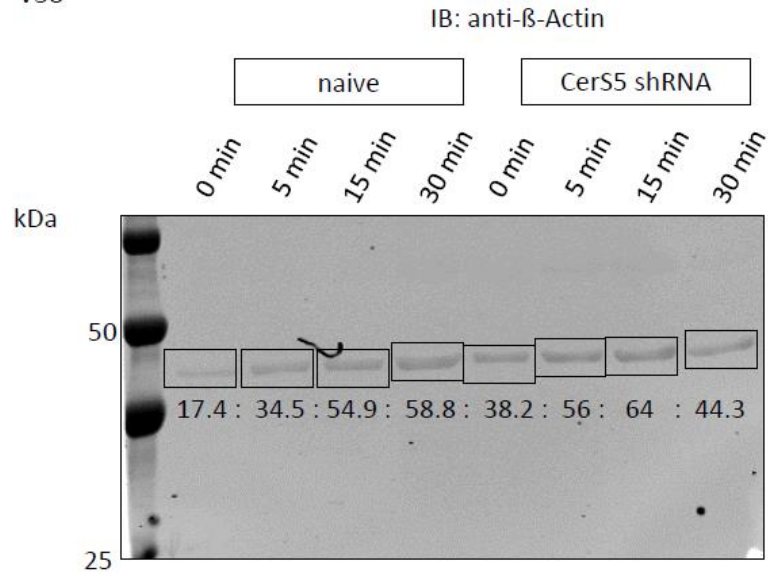

V42

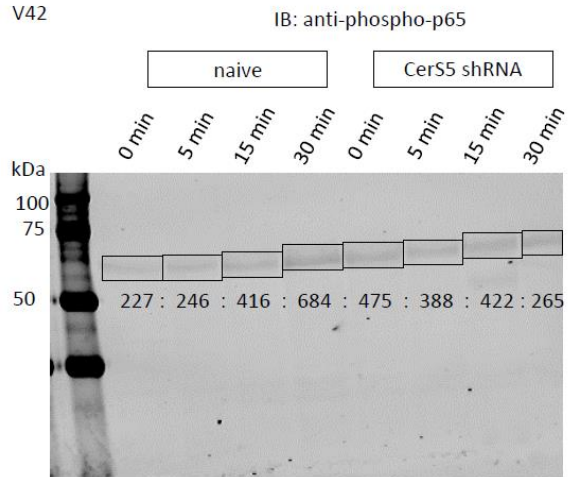

V42

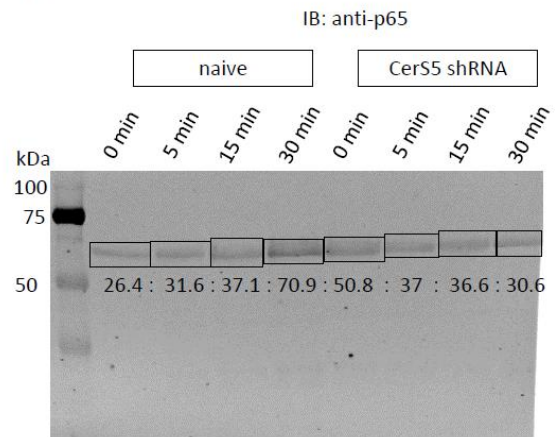

V42

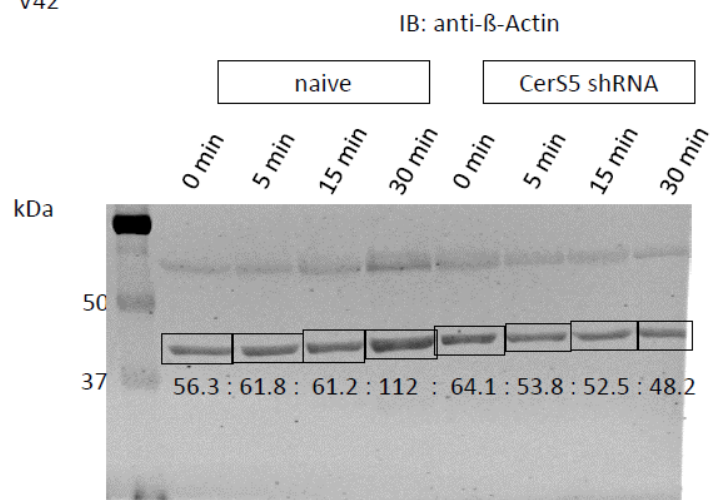

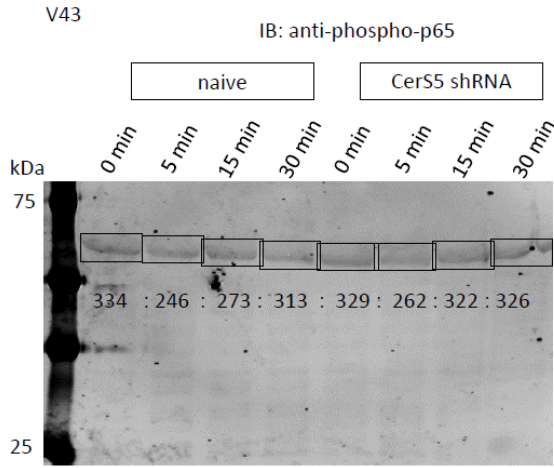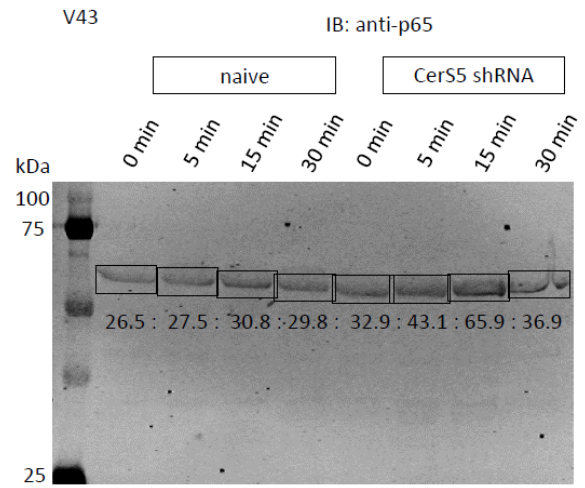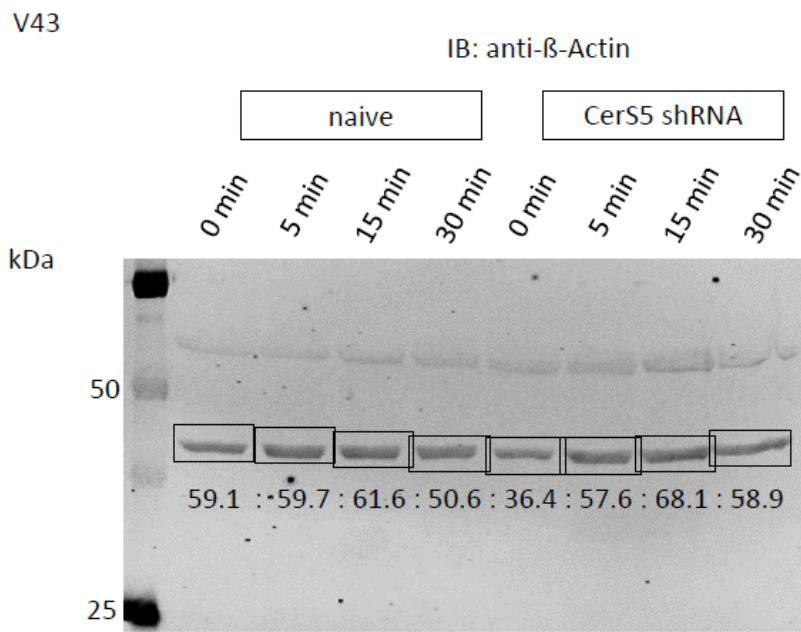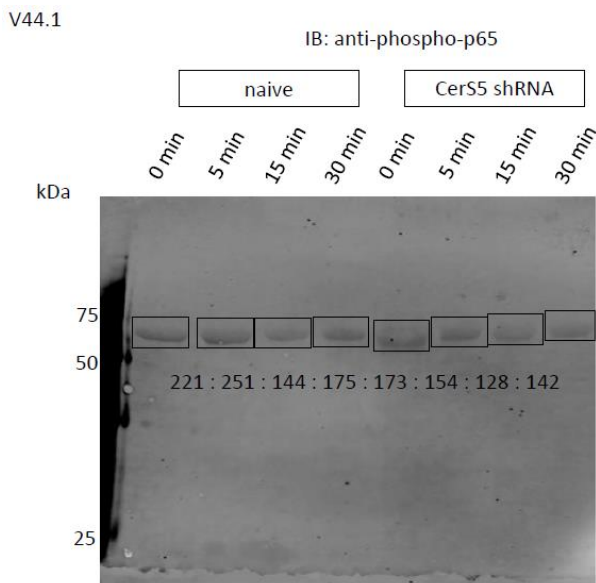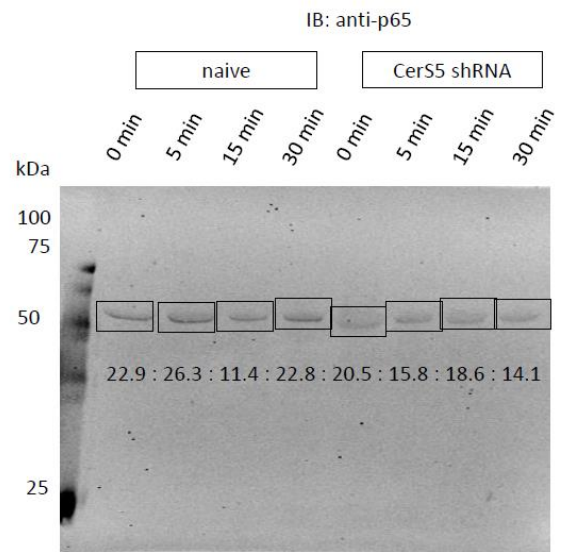



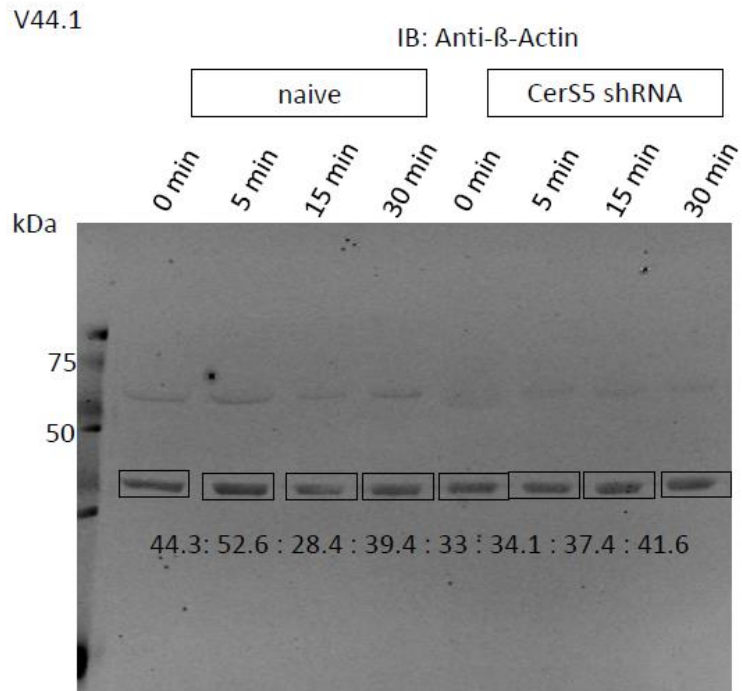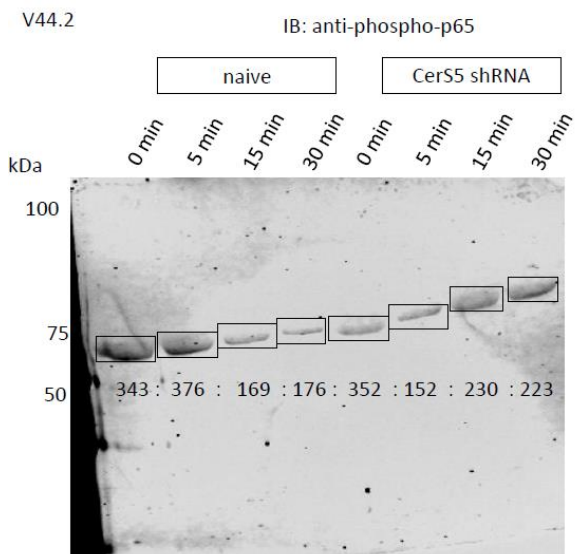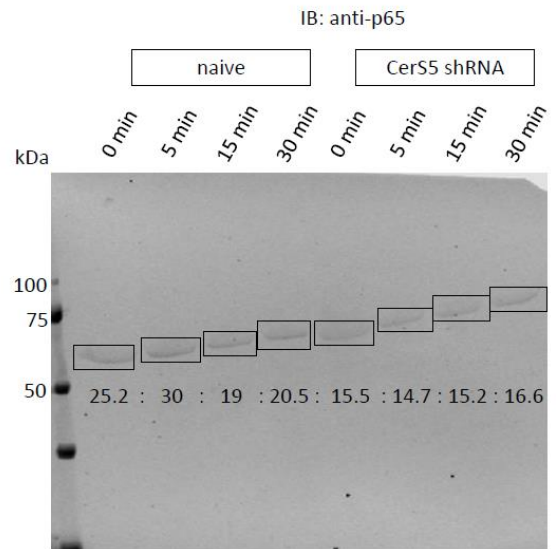

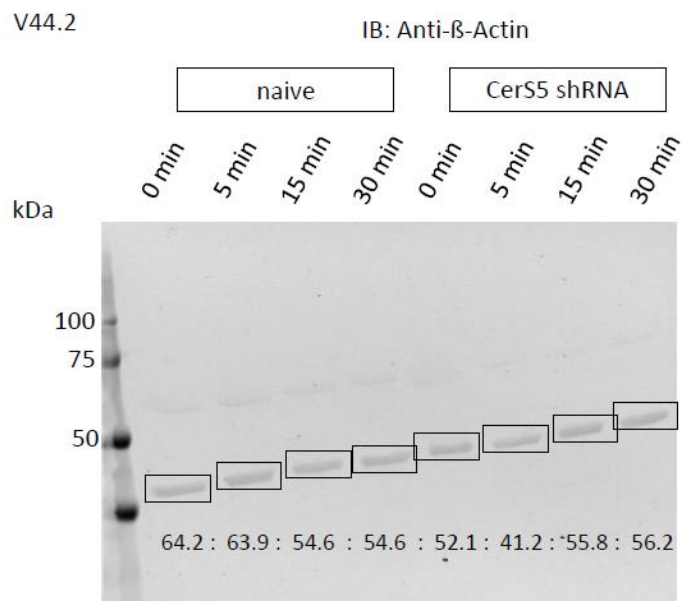

**Figure S4.** The whole western blot images.
